# Supplementary material for: Marine isoprene production and consumption in the mixed layer of the surface ocean – A field study over 2 oceanic regions
Source: Copernicus journal article supplement (doi:10.5194/bg-2017-257), 2017-06-29
Supplement: Supplementary file 1 [file bg-2017-257-supplement.pdf]

# Supplement

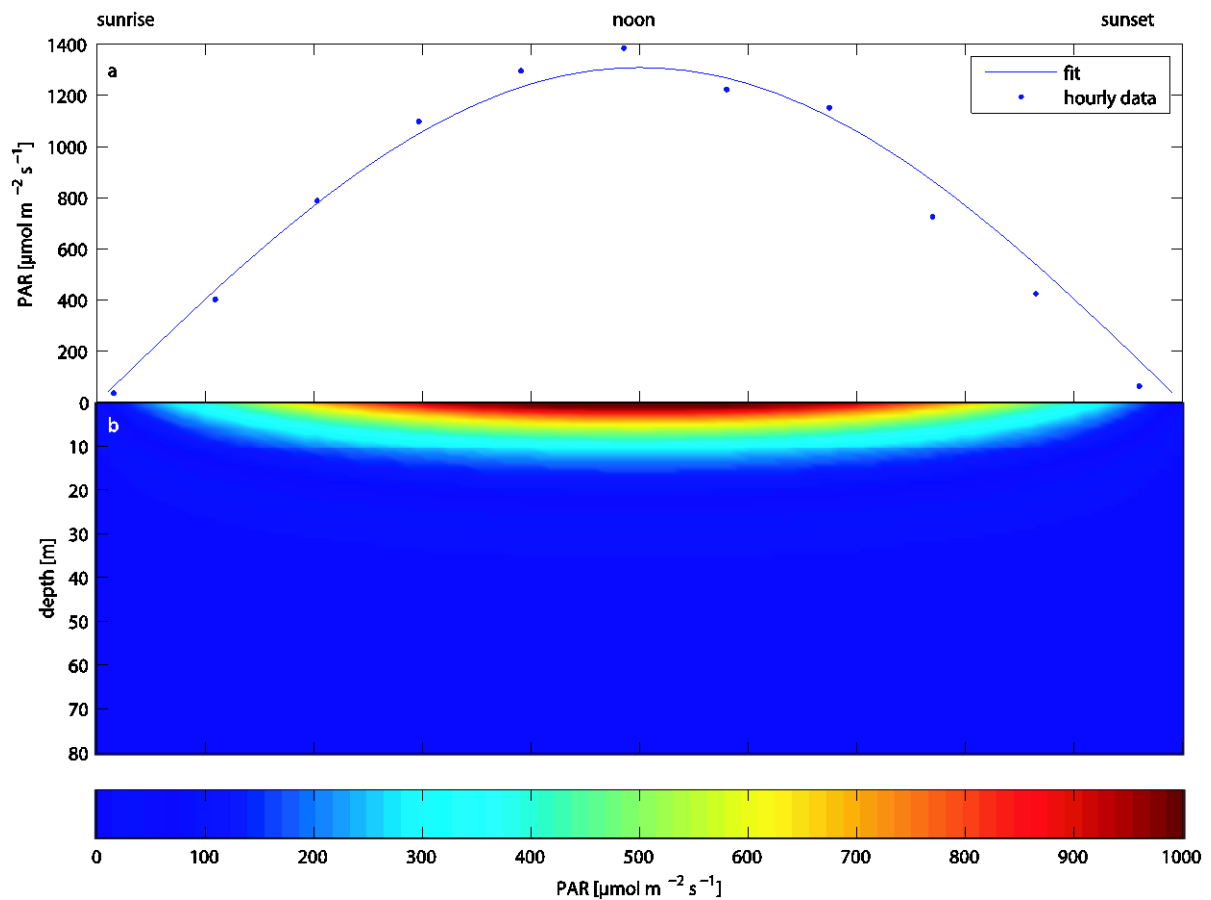

5 Figure S1: (a) Data points represent hourly radiation measurements ( $\text{W m}^{-2}$ ) from the ship (DOY 193.1 - 193.6 during SPACES) converted into photosynthetic active radiation (PAR,  $\mu\text{mol m}^{-2} \text{s}^{-1}$ ), blue line is the fitted data using a sine function. (b) Calculated PAR over the course of a day depending on depth by applying Beer-Lambert's law.

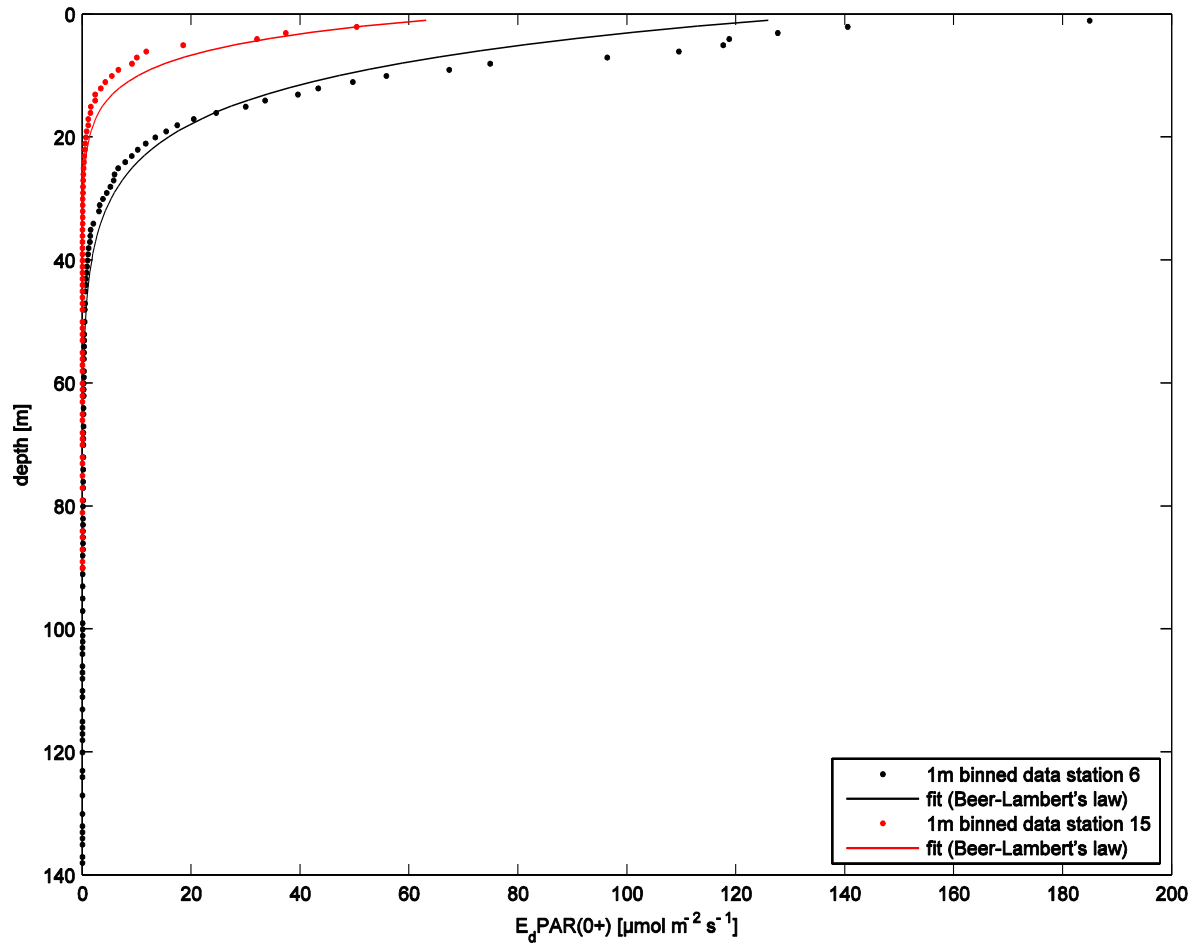

10 Figure S2: Example of two  $E_dPAR(0+)$  depth profile measurements during ASTRA-OMZ. Data points are 1m binned data of station 6 (black) and station 15 (red). The line is calculated from  $E_dPAR(0+)$  profile by applying Beer-Lambert's law using a station specific attenuation coefficient  $K_d$  obtained from the  $E_dPAR(0+)$  depth profile measurement at the corresponding station during ASTRA-OMZ.

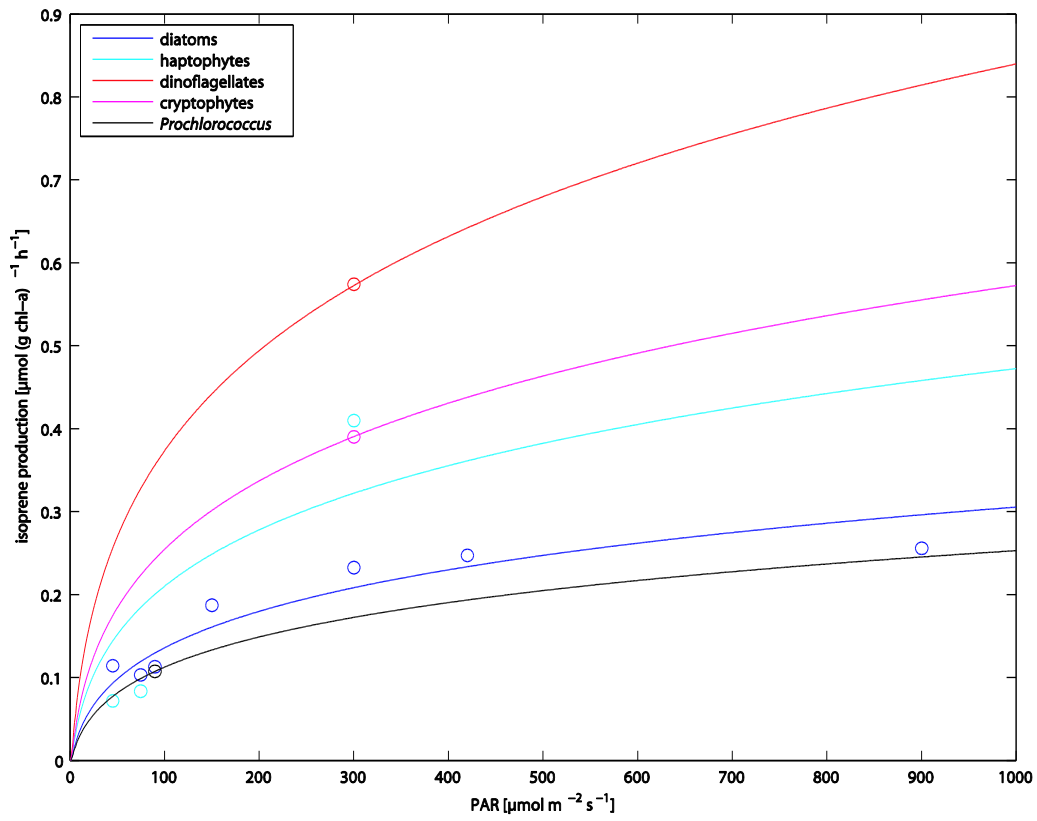

15 Figure S3: Single literature laboratory chl-a normalized isoprene production rates  $P_{chloro}$  ( $\mu\text{mol isoprene (g chl-a)}^{-1} \text{h}^{-1}$ ) (Table 2) as a log squared function of light intensity  $I$  ( $\mu\text{mol m}^{-2} \text{s}^{-1}$ ).

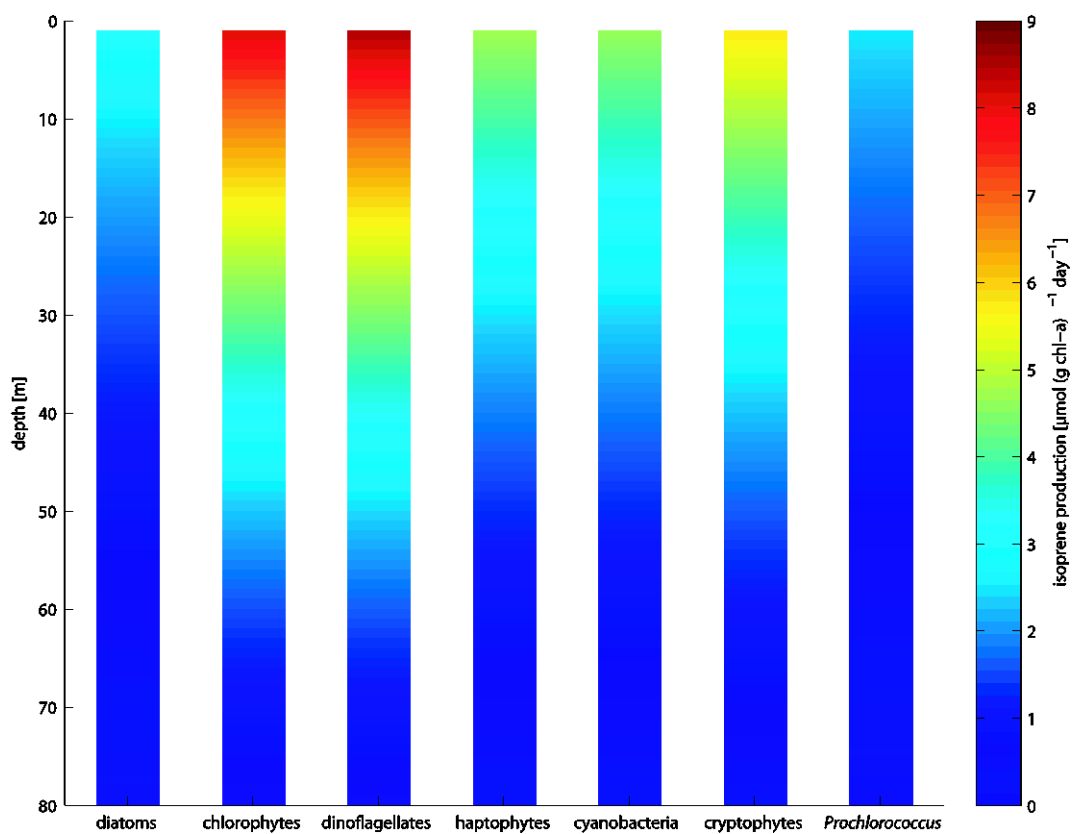

20 **Figure S4:** Example of calculated  $P_{chloro}$  values ( $\mu\text{mol isoprene (g chl-a)}^{-1} \text{ day}^{-1}$ ) for each PFT at station 9 during SPACES depending on the depth in the water column.

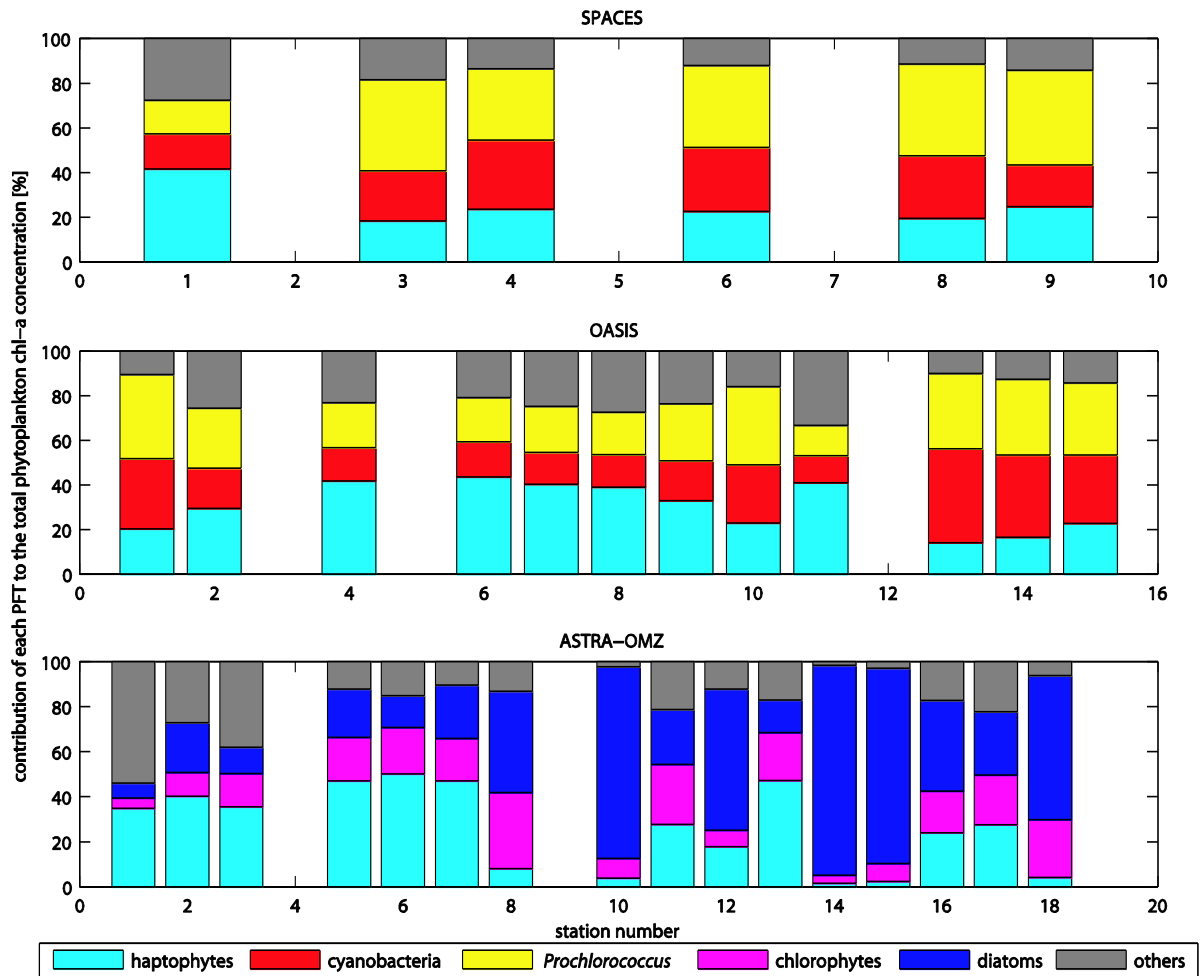

Figure S5: Contribution of each of the three most abundant PFTs to the total phytoplankton chl-a concentration at each station during SPACES (upper panel), OASIS (middle panel), and ASTRA-OMZ (bottom panel).
